# Supplementary material for: Effects of Diabetes Mellitus on Corneal Immune Cell Activation and the Development of Keratopathy
Source: MDPI journal article supplement (doi:10.3390/cells13060532), 2024-03-18
Supplement: s1 [file s1]

**Table S1.** Flow cytometry antibodies used in the experiments

|           |       |       |                 |           |
|-----------|-------|-------|-----------------|-----------|
| CD45      | 1:200 | A20   | APC-CY7         | Biolegend |
| Ly-6C     | 1:200 | HK1.4 | PE              | Biolegend |
| Ly-6G     | 1:200 | 18A   | PerCPC5.5       | Biolegend |
| CD11b     | 1:200 | M1/70 | BV785           | Biolegend |
| Zombie UV | 1:100 |       | INDO-1 (Violet) | Biolegend |
